# Supplementary material
Source: PubMed Central journal article supplement (PMC4493746)
Supplement: NIHMS683961-supplement-MOESM1.pdf [file NIHMS683961-supplement-MOESM1.pdf]

Table 1. Description of HIV-HAND and HIV-non HAND patients.

| Patient# | DateCSF    | Age | Gender | Race | Education | *Frascati - Code | Frascati - Text | **Plasma_VL | CD4 | ***CSF_VL | Cd4_nadir | CD4nadirRange |
|----------|------------|-----|--------|------|-----------|------------------|-----------------|-------------|-----|-----------|-----------|---------------|
| 1004     | 5/31/2005  | 46  | M      | AA   | 8         | 3                | HAD             | 169         | 977 | -1        | -1        | 100-199       |
| 1044     | 5/4/2006   | 50  | M      | AA   | 12        | 3                | HAD             | 65836       | 2   | 336       | 5         | <50           |
| 1046     | 9/12/2006  | 35  | M      | AA   | 12        | 3                | HAD             | <50         | 520 | <50       | 230       | 200-299       |
| 1007     | 9/19/2006  | 47  | M      | AA   | 12        | 3                | HAD             | <50         | 366 | <50       | 94        | 50-99         |
| 1018     | 1/3/2007   | 55  | M      | AA   | 12        | 1                | ANI             | <50         | 170 | <50       | 6         | <50           |
| 1289     | 6/4/2008   | 45  | F      | AA   | 16        | 3                | HAD             | <50         | 537 | <50       | 15        | <50           |
| 1083     | 12/10/2008 | 47  | M      | AA   | 11        | 3                | HAD             | <50         | 288 | 187       | -1        | 100-199       |
| 1202     | 5/28/2009  | 56  | F      | AA   | 11        | 3                | HAD             | <50         | 152 | <50       | 47        | <50           |
| 1210     | 7/8/2009   | 44  | M      | AA   | 14        | 3                | HAD             | <50         | 410 | <50       | 104       | 100-199       |
| 1084     | 1/22/2010  | 53  | M      | AA   | 12        | 3                | HAD             | <50         | 359 | <50       | 156       | 100-199       |
| 1037     | 10/17/2006 | 38  | M      | AA   | 12        | 0                | Normal          | <50         | 20  | <50       | 11        | <50           |
| 1025     | 10/26/2006 | 55  | F      | AA   | 12        | 0                | Normal          | <50         | 420 | <50       | -1        | 100-199       |
| 1015     | 1/17/2007  | 54  | M      | AA   | 14        | 0                | Normal          | <50         | 388 | <50       | 21        | <50           |
| 1070     | 4/30/2007  | 47  | M      | AA   | 16        | 0                | Normal          | 100         | 419 | <50       | 249       | 200-299       |
| 1056     | 6/19/2007  | 47  | F      | AA   | 9         | 0                | Normal          | <50         | 856 | <50       | 225       | 200-299       |
| 1035     | 11/14/2007 | 51  | F      | AA   | 8         | 0                | Normal          | <50         | 302 | <50       | 276       | 200-299       |
| 1095     | 6/19/2008  | 53  | F      | AA   | 14        | 0                | Normal          | <50         | 823 | <50       | 155       | 100-199       |
| 1088     | 9/8/2008   | 48  | M      | AA   | 12        | 0                | Normal          | <50         | 220 | 77        | 189       | 100-199       |
| 1057     | 1/13/2009  | 43  | F      | AA   | 12        | 0                | Normal          | <50         | 944 | <50       | -1        | 300-399       |
| 1269     | 1/20/2010  | 37  | F      | W    | 12        | 0                | Normal          | <50         | 377 | <50       | -1        | Unknown       |

\*Frascati-Code 0=Normal, 1=ANI, 2=MND, 3=HAD;

\*\*Plasma\_VL=Plasma Viral Load;

\*\*\*CSF\_VL=CSF Viral Load;

<50 =undetectable to 50 copies/mL;

<400 =undetectable to 400 copies/mL;

-1=Not performed or Unavailable.

Table 2. Description of control subjects.

| Controls | Age  | Gender | Race  | LP date         | Race  | CSF_Glucose | CSF_Protein | CSF_VDRL     | CSF_WBC | CSF_Polys | CSF_Lymphs | CSF_Monoc | CSF_RBC | Medical Hx/ Physical notes                                                                                                      |
|----------|------|--------|-------|-----------------|-------|-------------|-------------|--------------|---------|-----------|------------|-----------|---------|---------------------------------------------------------------------------------------------------------------------------------|
| 70118    | 32.2 | M      | AA    | 10/15/2009 0:00 | White | 70          | 50          | non-reactive | 3       | 28        | 35         | 37        | 398     | Herpes zoster infection in childhood.                                                                                           |
| 60023    | 47.3 | M      | White | 3/25/2010 0:00  | White | 53          | 59          | negative     | 2       | 0         | 41         | 59        | 0       |                                                                                                                                 |
| 60039    | 54.6 | M      | White | 4/25/2006 0:00  | White | 54          | 51          | Neg          | 3       | 13        | 74         | 13        | 1       | Depression (2006).                                                                                                              |
| 60048    | 49.3 | M      | White | 6/6/2006 0:00   | White | 59          | 42          | Neg          | 3       | 0         | 78         | 22        | 20      | Hypertension(2007). Gonorrhoea (1987). Hepatitis A (2000). TIA (2008).                                                          |
| 70080    | 29.2 | M      | AA    | 5/29/2007 0:00  | AA    | 58          | 32          | non-reactive | 0       | not done  | not done   | not done  | 15      | None. Normal                                                                                                                    |
| 80155    | 27.9 | F      | AA    | 12/24/2008 0:00 | AA    | 58          | 28          | non-reactive | 0       | 0         | 0          | 0         | 131     | Surgeries: 4 C-sections. No complications.                                                                                      |
| 90149    | 46   | M      | White | 10/30/2009 0:00 | White | 60          | 53          | not ordered  | 5       | 0         | 85         | 15        | 0       | None. Normal                                                                                                                    |
| 100087   | 47.4 | M      | White | 5/12/2010 0:00  | White | 54          | 37          | non-reactive | 4       | 0         | 79         | 20        | 4       | Hepatitis C (2000) Low viral count, no treatment required. Candidiasis (2001). Inguinal hernia (2009). Asthma (Dx in childhood) |
| 100263   | 47.3 | M      | White | 12/15/2010 0:00 | White | 72          | 68          | non-reactive | 2       | 0         | 77         | 23        | 1       | Thyroid cancer in remission (2003).                                                                                             |
| 100294   | 53   | F      | White | 1/21/2011 0:00  | White | 61          | 29          | non-reactive | 10      | 0         | 83         | 17        | 13      | Dyslexia (childhood). Menopause (2009). Ear infection (2012). Hearing loss (2013)                                               |
