# Supplementary material
Source: PubMed Central journal article supplement (PMC4493746)
Supplement: NIHMS683961-supplement-MOESM2.pdf [file NIHMS683961-supplement-MOESM2.pdf]

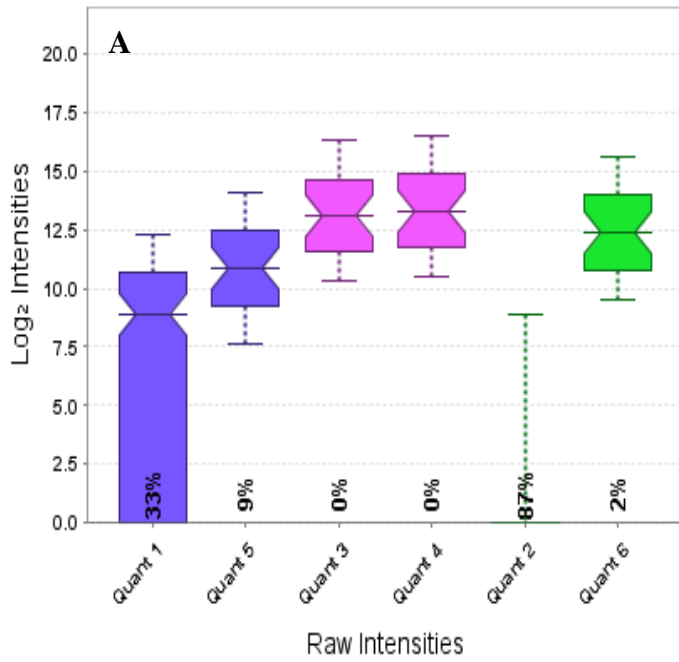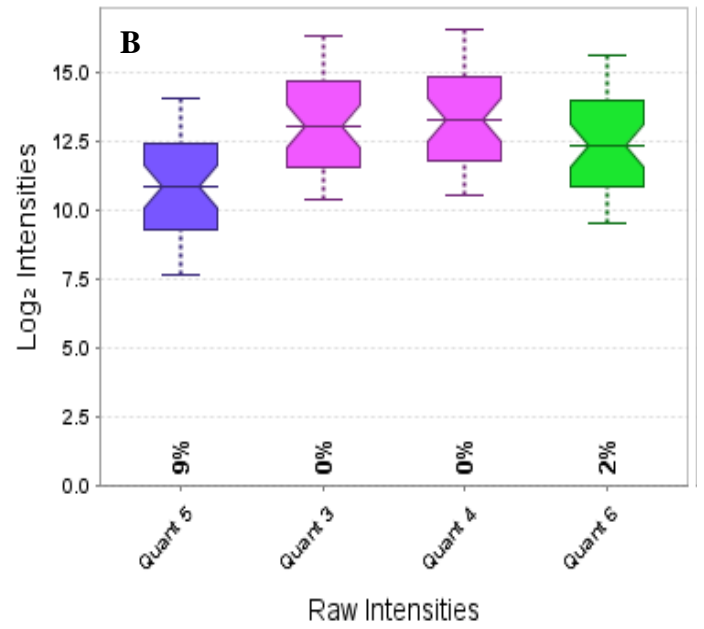

Figure 1 A) Raw intensities showing channel 1 and 2 label misincorporation B) Raw intensities after removing the channel 1 and 2.

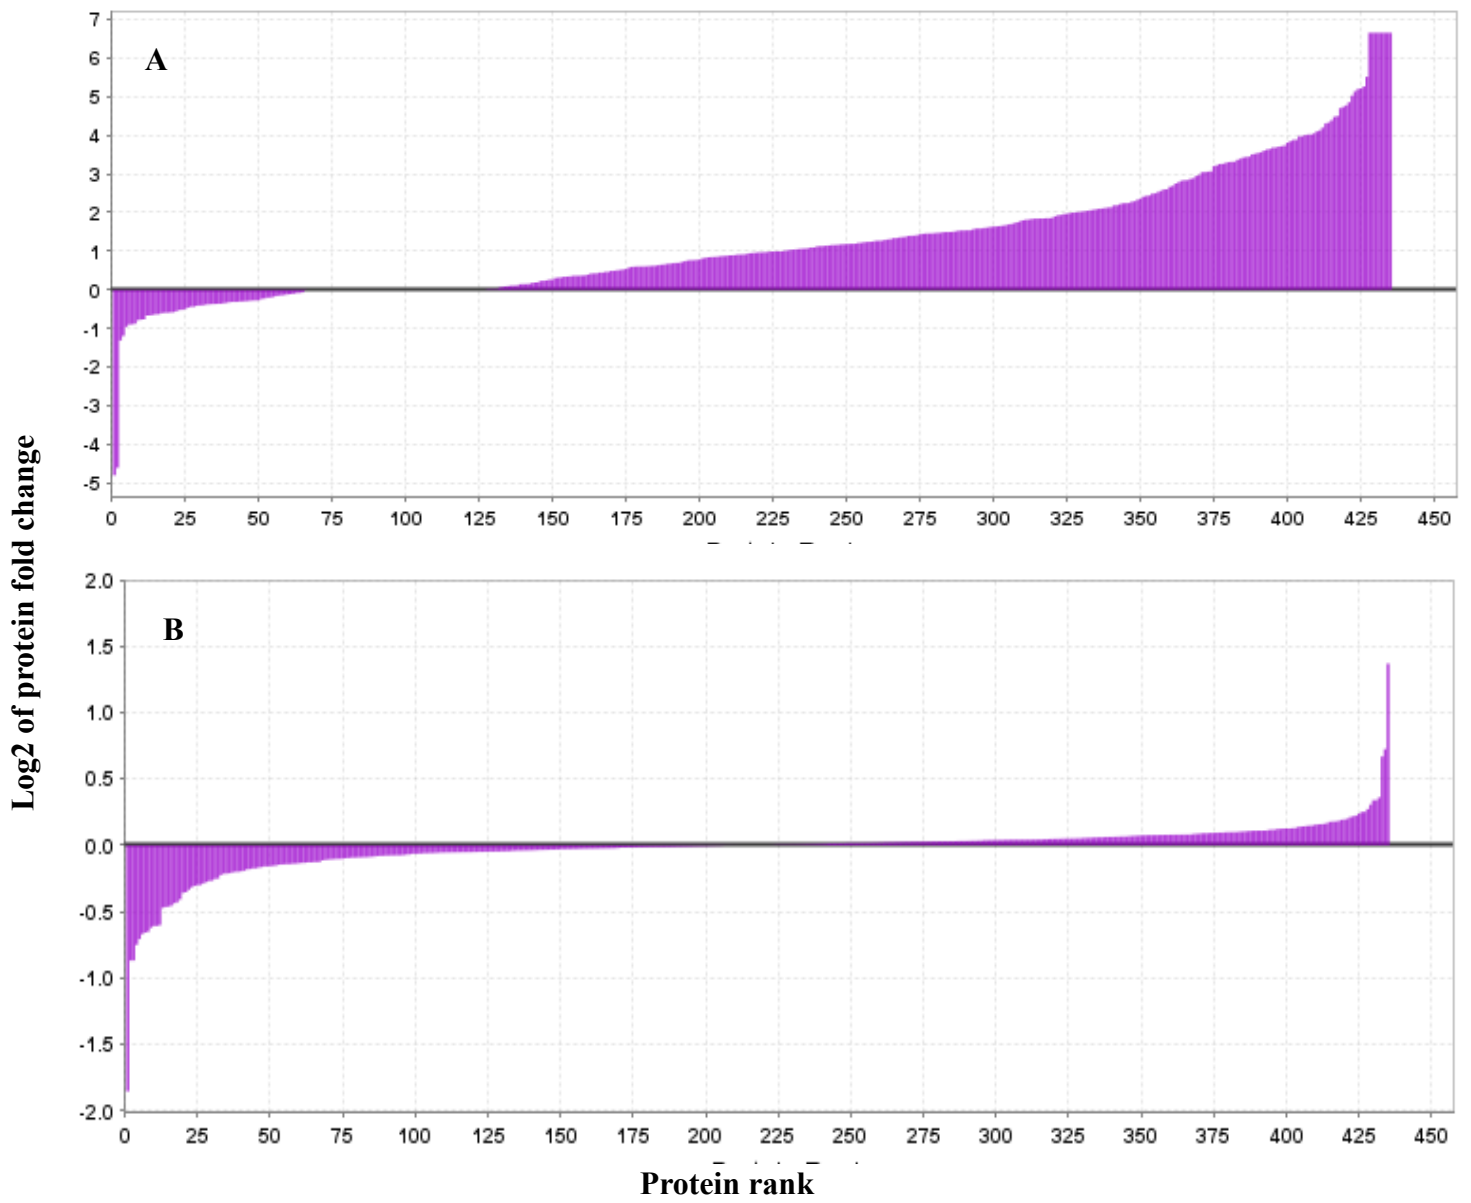

Figure 2 Normalized data: A) Before removing the outliers; B) After removing the outliers
