# Supplementary material
Source: PubMed Central journal article supplement (PMC4493746)
Supplement: NIHMS683961-supplement-MOESM3.pdf [file NIHMS683961-supplement-MOESM3.pdf]

- Kruskal-Walli test **with Bonferroni** correction; CI 95%,  $p \leq 0.05$

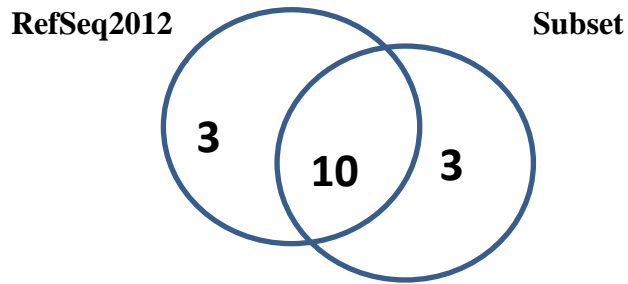

**RefSeq2012 (3 proteins)**

|                                     |               |
|-------------------------------------|---------------|
| testican-1 precursor                | gi   4759164  |
| complement factor B preproprotein   | gi   67782358 |
| fibronectin isoform 4 preproprotein | gi   47132555 |

**Subset (3 proteins)**

|                                      |               |
|--------------------------------------|---------------|
| transthyretin precursor              | gi   4507725  |
| complement C2 isoform 1 preproprotei | gi   14550407 |
| secretogranin-3 isoform 1 precursor  | gi   19557645 |

- Kruskal-Walli test **with Bonferroni** correction; CI 75-95%,  $p \leq 0.05$

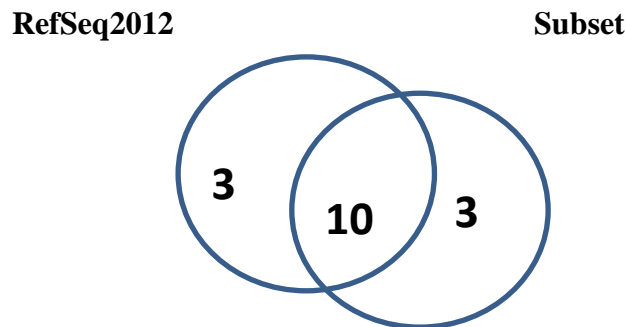

**RefSeq2012 (3 proteins)**

|                                     |               |
|-------------------------------------|---------------|
| fibronectin isoform 4 preproprotein | gi   47132555 |
| complement factor B preproprotein   | gi   67782358 |
| calsyntenin-3 precursor             | gi   42475534 |

### Subset (3 proteins)

|                                     |                |
|-------------------------------------|----------------|
| transthyretin precursor             | gi   4507725   |
| IgGfc-binding protein precursor     | gi   154146262 |
| complement C2 isoform 1 preproprote | gi   14550407  |

- Kruskal-Walli test **without Bonferroni** correction; CI 95%,  $p \leq 0.05$

RefSeq2012

Subset

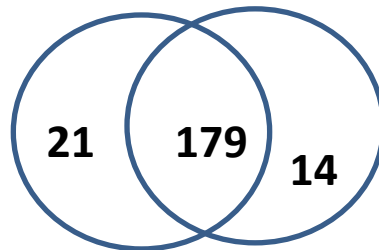

### RefSeq2012 (21 proteins)

|                                                                                             |                |
|---------------------------------------------------------------------------------------------|----------------|
| collagen alpha-1(XVIII) chain isoform 2 precursor                                           | gi   110611233 |
| insulin-like growth factor-binding protein 6 precursor                                      | gi   11321593  |
| disintegrin and metalloproteinase domain-containing protein 22 isoform 1 preproprotein      | gi   11497047  |
| gi   119372317-DECOY   ref   NP_689594.4   xin actin-binding repeat-containing protein 2... | gi   119372317 |
| low-density lipoprotein receptor-related protein 2 precursor                                | gi   126012573 |
| reticulon-4 receptor precursor                                                              | gi   13194201  |
| complement C1q subcomponent subunit C precursor                                             | gi   166235903 |
| neuronal pentraxin receptor                                                                 | gi   17402888  |
| ephrin type-B receptor 6 precursor                                                          | gi   194097332 |
| ectonucleotide pyrophosphatase/phosphodiesterase family member 2 isoform 3 preproprotein    | gi   195947389 |
| beta-Ala-His dipeptidase precursor                                                          | gi   21071039  |
| immunoglobulin J chain precursor                                                            | gi   21489959  |
| macrophage colony-stimulating factor 1 receptor precursor                                   | gi   27262659  |
| gi   281427284-DECOY                                                                        | gi   281427284 |
| vitamin D-binding protein isoform 1 precursor                                               | gi   32483410  |
| titin isoform 1                                                                             | gi   378925625 |
| angiotensinogen preproprotein                                                               | gi   4557287   |
| fibronectin isoform 4 preproprotein                                                         | gi   47132555  |
| contactin-2 precursor                                                                       | gi   4827022   |
| epididymal secretory protein E1 precursor                                                   | gi   5453678   |
| EGF-containing fibulin-like extracellular matrix protein 1 precursor                        | gi   86788015  |

### Subset (14 proteins)

|                                                                      |                |
|----------------------------------------------------------------------|----------------|
| spectrin beta chain, brain 3 isoform sigma1                          | gi   115430237 |
| gi   150378539-DECOY ref NP_149015.2  protein piccolo isoform 1      | gi   150378539 |
| fibulin-7 isoform 1 precursor                                        | gi   189491645 |
| vitamin K-dependent protein S preproprotein                          | gi   192447438 |
| unconventional myosin-Va isoform 1                                   | gi   215982791 |
| multimerin-2 precursor                                               | gi   221316695 |
| nebulin isoform 1                                                    | gi   257743023 |
| vitamin D-binding protein isoform 3 precursor                        | gi   324021745 |
| VPS10 domain-containing receptor SorCS1 isoform c precursor          | gi   331028410 |
| pyruvate kinase isozymes M1/M2 isoform c                             | gi   332164775 |
| actin, cytoplasmic 1                                                 | gi   4501885   |
| coagulation factor X preproprotein                                   | gi   4503625   |
| receptor-type tyrosine-protein phosphatase delta isoform 1 precursor | gi   4506309   |
| complement C1r subcomponent precursor                                | gi   66347875  |

- Kruskal-Walli test **without Bonferroni** correction; CI 75-95%,  $p \leq 0.05$

RefSeq2012

Subset

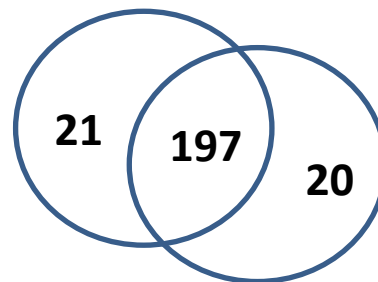

**RefSeq2012 (21 proteins)**

|                                                                                        |                |
|----------------------------------------------------------------------------------------|----------------|
| collagen alpha-1(XVIII) chain isoform 2 precursor                                      | gi   110611233 |
| insulin-like growth factor-binding protein 6 precursor                                 | gi   11321593  |
| gi   119372317-DECOY ref NP_689594.4  xin actin-binding repeat-containing protein 2... | gi   119372317 |
| low-density lipoprotein receptor-related protein 2 precursor                           | gi   126012573 |
| reticulon-4 receptor precursor                                                         | gi   13194201  |
| complement C1q subcomponent subunit C precursor                                        | gi   166235903 |
| ephrin type-B receptor 6 precursor                                                     | gi   194097332 |
| immunoglobulin J chain precursor                                                       | gi   21489959  |
| macrophage colony-stimulating factor 1 receptor precursor                              | gi   27262659  |
| gi   281427284-DECOY                                                                   | gi   281427284 |
| vitamin D-binding protein isoform 1 precursor                                          | gi   32483410  |
| titin isoform 1                                                                        | gi   378925625 |
| brevican core protein isoform 1 precursor                                              | gi   38372935  |
| semaphorin-7A isoform 1 preproprotein                                                  | gi   4504237   |
| neuroendocrine protein 7B2 isoform 2 precursor                                         | gi   4506917   |
| angiotensinogen preproprotein                                                          | gi   4557287   |
| fibronectin isoform 4 preproprotein                                                    | gi   47132555  |
| contactin-2 precursor                                                                  | gi   4827022   |
| epididymal secretory protein E1 precursor                                              | gi   5453678   |
| EGF-containing fibulin-like extracellular matrix protein 1 precursor                   | gi   86788015  |
| olfactomedin-like protein 3 precursor                                                  | gi   9910270   |

## Subset (20 proteins)

|                                                                      |                |
|----------------------------------------------------------------------|----------------|
| spectrin beta chain, brain 3 isoform sigma1                          | gi   115430237 |
| seizure protein 6 homolog isoform 1 precursor                        | gi   148839280 |
| gi   150378539-DECOY ref NP_149015.2                                 |                |
| protein piccolo isoform 1                                            | gi   150378539 |
| fibulin-7 isoform 1 precursor                                        | gi   189491645 |
| vitamin K-dependent protein S preproprotein                          | gi   192447438 |
| amyloid beta A4 protein isoform d                                    | gi   209862833 |
| unconventional myosin-Va isoform 1                                   | gi   215982791 |
| multimerin-2 precursor                                               | gi   221316695 |
| dynein heavy chain domain-containing protein 1 isoform 1             | gi   222144249 |
| semaphorin-7A isoform 2 preproprotein                                | gi   225637520 |
| nebulin isoform 1                                                    | gi   257743023 |
| tyrosine-protein kinase receptor TYRO3 precursor                     | gi   27597078  |
| vitamin D-binding protein isoform 3 precursor                        | gi   324021745 |
| VPS10 domain-containing receptor SorCS1 isoform c precursor          | gi   331028410 |
| pyruvate kinase isozymes M1/M2 isoform c                             | gi   332164775 |
| seizure 6-like protein 2 isoform 5 precursor                         | gi   343183403 |
| actin, cytoplasmic 1                                                 | gi   4501885   |
| coagulation factor X preproprotein                                   | gi   4503625   |
| receptor-type tyrosine-protein phosphatase delta isoform 1 precursor | gi   4506309   |
| chondroitin sulfate proteoglycan 4 precursor                         | gi   47419930  |

- Permutation test **with Bonferroni** correction; CI 95%,  $p \leq 0.05$

RefSeq2012

Subset

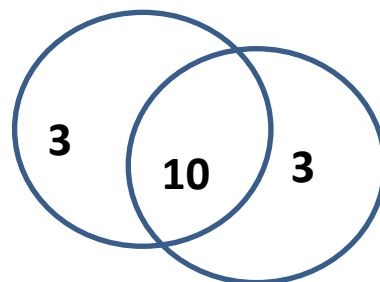

### RefSeq2012 (3 proteins)

|                                     |               |
|-------------------------------------|---------------|
| testican-1 precursor                | gi   4759164  |
| complement factor B preproprotein   | gi   67782358 |
| fibronectin isoform 4 preproprotein | gi   47132555 |

### Subset (3 proteins)

|                                       |               |
|---------------------------------------|---------------|
| transthyretin precursor               | gi   4507725  |
| complement C2 isoform 1 preproprotein | gi   14550407 |
| secretogranin-3 isoform 1 precursor   | gi   19557645 |

- Permutation test with **Bonferroni** correction; CI 75-95%,  $p \leq 0.05$

RefSeq2012

Subset

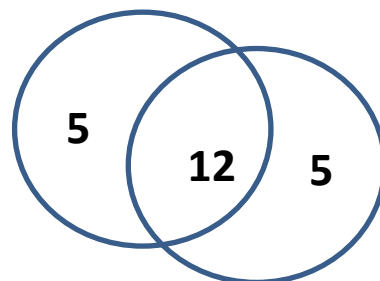

### RefSeq2012 (5 proteins)

|                                         |               |
|-----------------------------------------|---------------|
| fibronectin isoform 4 preproprotein     | gi   47132555 |
| alpha-N-acetylglucosaminidase precursor | gi   66346698 |
| testican-1 precursor                    | gi   4759164  |
| complement factor B preproprotein       | gi   67782358 |
| calyntenin-3 precursor                  | gi   42475534 |

### Subset (5proteins)

|                                   |                |
|-----------------------------------|----------------|
| complement C2 isoform 1 prepro    | gi   14550407  |
| secretogranin-3 isoform 1 precurs | gi   19557645  |
| vitamin D-binding protein isoform | gi   324021745 |
| prothrombin preproprotein         | gi   4503635   |
| proenkephalin-A preproprotein     | gi   5453876   |

- Permutation test **without Bonferroni** correction; CI 95%,  $p \leq 0.05$

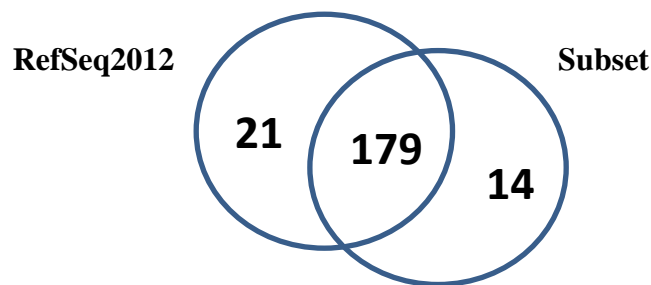

### RefSeq2012 database (21 unique proteins)

|                                                                                          |                |
|------------------------------------------------------------------------------------------|----------------|
| collagen alpha-1(XVIII) chain isoform 2 precursor                                        | gi   110611233 |
| insulin-like growth factor-binding protein 6 precursor                                   | gi   11321593  |
| disintegrin and metalloproteinase domain-containing protein 22 isoform 1 precursor       | gi   11497047  |
| gi   119372317-DECOY ref NP_689594.4  xin actin-binding repeat-containing protein 2...   | gi   119372317 |
| low-density lipoprotein receptor-related protein 2 precursor                             | gi   126012573 |
| reticulon-4 receptor precursor                                                           | gi   13194201  |
| complement C1q subcomponent subunit C precursor                                          | gi   166235903 |
| neuronal pentraxin receptor                                                              | gi   17402888  |
| ephrin type-B receptor 6 precursor                                                       | gi   194097332 |
| ectonucleotide pyrophosphatase/phosphodiesterase family member 2 isoform 3 preproprotein | gi   195947389 |
| beta-Ala-His dipeptidase precursor                                                       | gi   21071039  |
| immunoglobulin J chain precursor                                                         | gi   21489959  |
| macrophage colony-stimulating factor 1 receptor precursor                                | gi   27262659  |
| gi   281427284-DECOY                                                                     | gi   281427284 |
| vitamin D-binding protein isoform 1 precursor                                            | gi   32483410  |
| titin isoform 1                                                                          | gi   378925625 |
| angiotensinogen preproprotein                                                            | gi   4557287   |
| fibronectin isoform 4 preproprotein                                                      | gi   47132555  |
| contactin-2 precursor                                                                    | gi   4827022   |
| epididymal secretory protein E1 precursor                                                | gi   5453678   |
| EGF-containing fibulin-like extracellular matrix protein 1 precursor                     | gi   86788015  |

**Subset database( unique 14 proteins)**

|                                                                                     |                |
|-------------------------------------------------------------------------------------|----------------|
| spectrin beta chain, brain 3 isoform sigma1<br>gi   150378539-DECOY ref NP_149015.2 | gi   115430237 |
| protein piccolo isoform 1                                                           | gi   150378539 |
| fibulin-7 isoform 1 precursor                                                       | gi   189491645 |
| vitamin K-dependent protein S preproprotein                                         | gi   192447438 |
| unconventional myosin-Va isoform 1                                                  | gi   215982791 |
| multimerin-2 precursor                                                              | gi   221316695 |
| nebulin isoform 1                                                                   | gi   257743023 |
| vitamin D-binding protein isoform 3 precursor                                       | gi   324021745 |
| VPS10 domain-containing receptor SorCS1<br>isoform c precursor                      | gi   331028410 |
| pyruvate kinase isozymes M1/M2 isoform c                                            | gi   332164775 |
| actin, cytoplasmic 1                                                                | gi   4501885   |
| coagulation factor X preproprotein                                                  | gi   4503625   |
| receptor-type tyrosine-protein phosphatase delta is                                 | gi   4506309   |
| complement C1r subcomponent precursor                                               | gi   66347875  |

- Permutation test **without Bonferroni** correction; CI 75-95%,  $p \leq 0.05$

**RefSeq2012**

**Subset**

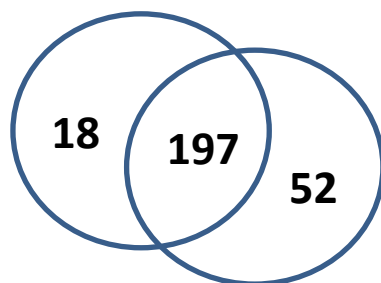



**RefSeq2012 (18 proteins)**

|                                                                  |                |
|------------------------------------------------------------------|----------------|
| apolipoprotein B-100 precursor                                   | gi   105990532 |
| collagen alpha-1(XVIII) chain isoform 2 precursor                | gi   110611233 |
| neural cell adhesion molecule 1 isoform 2 precursor              | gi   115529482 |
| gi   119372317-DECOY ref NP_689594.4  xin                        |                |
| actin-binding repeat-containing protein 2...                     | gi   119372317 |
| reticulon-4 receptor precursor                                   | gi   13194201  |
| N-acetylglucosamine-1-phosphotransferase subunit gamma           | gi   14249738  |
| platelet-derived growth factor subunit A isoform 2 preproprotein | gi   15208656  |
| immunoglobulin J chain precursor                                 | gi   21489959  |
| apolipoprotein M isoform 1                                       | gi   22091452  |
| macrophage colony-stimulating factor 1 receptor precursor        | gi   27262659  |
| gi   281427284-DECOY                                             | gi   281427284 |
| neuroendocrine convertase 1 isoform 2                            | gi   295424143 |
| matrix Gla protein isoform 1 precursor                           | gi   299890879 |
| vitamin D-binding protein isoform 1 precursor                    | gi   32483410  |
| fibronectin isoform 4 preproprotein                              | gi   47132555  |
| osteopontin isoform b precursor                                  | gi   4759166   |
| oligodendrocyte-myelin glycoprotein precursor                    | gi   52426787  |
| epididymal secretory protein E1 precursor                        | gi   5453678   |

**Subset (52 proteins)**

|                                                                     |                |
|---------------------------------------------------------------------|----------------|
| collagen alpha-1(VI) chain precursor                                | gi   87196339  |
| complement C1r subcomponent precursor                               | gi   66347875  |
| calsyntenin-1 isoform 2 precursor                                   | gi   57242755  |
| cathepsin F precursor                                               | gi   6042196   |
| translational activator GCN1                                        | gi   54607053  |
| voltage-dependent calcium channel subunit alpha-2/delta-1 precursor | gi   54112390  |
| ATP-binding cassette sub-family A member 2 isoform b                | gi   47078218  |
| chondroitin sulfate proteoglycan 4 precursor                        | gi   47419930  |
| ceruloplasmin precursor                                             | gi   4557485   |
| latent-transforming growth factor beta-binding protein 2 precursor  | gi   4557733   |
| kallikrein-6 isoform A preproprotein                                | gi   4506155   |
| lumican precursor                                                   | gi   4505047   |
| histidine-rich glycoprotein precursor                               | gi   4504489   |
| coagulation factor X preproprotein                                  | gi   4503625   |
| zinc-alpha-2-glycoprotein precursor                                 | gi   4502337   |
| actin, cytoplasmic 1                                                | gi   4501885   |
| plectin isoform 1a                                                  | gi   41322923  |
| CD166 antigen isoform 2 precursor                                   | gi   343168770 |
| seizure 6-like protein 2 isoform 5 precursor                        | gi   343183403 |
| clusterin preproprotein                                             | gi   355594753 |
| VPS10 domain-containing receptor SorCS1 isoform c precursor         | gi   331028410 |
| pyruvate kinase isozymes M1/M2 isoform c                            | gi   332164775 |
| neural cell adhesion molecule 2 precursor                           | gi   33519481  |
| vitamin D-binding protein isoform 3 precursor                       | gi   324021745 |
| inter-alpha-trypsin inhibitor heavy chain H5 isoform 1 precursor    | gi   310703621 |
| extracellular sulfatase Sulf-2 isoform a precursor                  | gi   29789100  |

**Subset (52 proteins cont.)**

|                                                                   |                |
|-------------------------------------------------------------------|----------------|
| ubiquitin-40S ribosomal protein S27a precursor                    | gi   294459921 |
| contactin-1 isoform 1 precursor                                   | gi   28373117  |
| tyrosine-protein kinase receptor TYRO3 precursor                  | gi   27597078  |
| nebulin isoform 1                                                 | gi   257743023 |
| semaphorin-7A isoform 2 preproprotein                             | gi   225637520 |
| unconventional myosin-Va isoform 1                                | gi   215982791 |
| multimerin-2 precursor                                            | gi   221316695 |
| dynein heavy chain domain-containing protein 1 isoform 1          | gi   222144249 |
| alpha-1B-glycoprotein precursor                                   | gi   21071030  |
| neurexin-3-beta isoform 1 precursor                               | gi   21070969  |
| amyloid beta A4 protein isoform d                                 | gi   209862833 |
| vitamin K-dependent protein S preproprotein                       | gi   192447438 |
| fibulin-7 isoform 1 precursor                                     | gi   189491645 |
| SPARC-like protein 1 precursor                                    | gi   190341024 |
| alpha-2-HS-glycoprotein preproprotein                             | gi   156523970 |
| tetranectin precursor                                             | gi   156627579 |
| neogenin isoform 1 precursor                                      | gi   157311649 |
| gi   160948599-DECOY                                              | gi   160948599 |
| contactin-associated protein-like 4 isoform 2                     | gi   148664242 |
| seizure protein 6 homolog isoform 1 precursor                     | gi   148839280 |
| multiple epidermal growth factor-like domains protein 8 precursor | gi   145701025 |
| retina and anterior neural fold homeobox protein 2                | gi   14249388  |
| basement membrane-specific heparan sulfate proteoglycan core prot | gi   126012571 |
| spectrin beta chain, brain 3 isoform sigma1                       | gi   115430237 |
| alpha-2-antiplasmin isoform a precursor                           | gi   115583663 |
| proactivator polypeptide isoform c preproprotein                  | gi   110224479 |
